# Supplementary material for: PUB11-Dependent Ubiquitination of the Phospholipid Flippase ALA10 Modifies ALA10 Localization and Affects the Pool of Linolenic Phosphatidylcholine
Source: Front Plant Sci. 2020 Jul 15;11:1070. doi: 10.3389/fpls.2020.01070 (PMC7373794; doi:10.3389/fpls.2020.01070)
Supplement: Supplemental Table 1 — Result of mass spectrometry analysis of the immunopurified ALA10-GFP fraction purified on a SDS-PAGE gel between 150 and 200 kDa. Results are from 3 independent biological and immunopurification experiments. In purple is emphasized the peptides corresponding to ALA10 protein, in green to GFP and in yellow to the ubiquitin. [file Table_1.xlsx]

## Sheet:  experiment 1
accession	samesets_accessions	subsets_accessions	description	protein_set_score	coverage	MW	sequences	specific_sequences	peptides	specific_peptides
AT3G25610.1	AT3G25610.1	AT1G13210.1; AT1G26130.1; AT1G26130.2; AT1G54280.1; AT1G59820.1; AT1G68710.1; AT3G13900.1; AT3G27870.1	| Symbols: | ATPase E1-E2 type family protein / haloacid dehalogenase-like hydrolase family protein | chr3:9308942-9313353 REVERSE LENGTH=1202	2730.49	31.95	136279	41	41	45	45
AT5G64420.1	AT5G64420.1		| Symbols: | DNA polymerase V family | chr5:25756416-25761122 FORWARD LENGTH=1306	440.88	5.97	146115	7	7	8	8
AT2G38770.1	AT2G38770.1		| Symbols: EMB2765 | P-loop containing nucleoside triphosphate hydrolases superfamily protein | chr2:16203185-16210253 REVERSE LENGTH=1509	365.33	5.43	173022	7	7	8	8
AT3G52140.1	AT3G52140.1; AT3G52140.2; AT3G52140.3; AT3G52140.4		| Symbols: | tetratricopeptide repeat (TPR)-containing protein | chr3:19333232-19341295 FORWARD LENGTH=1403	130.77	1.78	153266	2	2	2	2
AT1G56110.1	AT1G56110.1		| Symbols: NOP56 | homolog of nucleolar protein NOP56 | chr1:20984544-20986893 REVERSE LENGTH=522	103.07	3.64	58673	2	2	2	2
AT1G23410.1	AT1G23410.1; AT1G31340.1; AT1G55060.1; AT1G65350.1; AT2G35635.1; AT2G36170.1; AT2G47110.1; AT2G47110.2; AT3G52590.1; AT3G62250.1; AT4G02890.1; AT4G02890.2; AT4G02890.3; AT4G02890.4; AT4G05050.1; AT4G05050.2; AT4G05050.3; AT4G05050.4; AT4G05320.1; AT4G05320.2; AT4G05320.3; AT4G05320.4; AT4G05320.5; AT4G05320.6; AT5G03240.1; AT5G03240.2; AT5G03240.3; AT5G20620.1; AT5G37640.1	AT3G09790.1	| Symbols: | Ribosomal protein S27a / Ubiquitin family protein | chr1:8314940-8315410 FORWARD LENGTH=156	101.64	18.59	17672	2	2	2	2
AT5G64270.1	AT5G64270.1		| Symbols: | splicing factor, putative | chr5:25706909-25710718 FORWARD LENGTH=1269	77.27	1.5	141450	2	2	2	2
AT1G72440.1	AT1G72440.1		| Symbols: EDA25, SWA2 | CCAAT-binding factor | chr1:27268325-27273596 REVERSE LENGTH=1043	75.91	1.34	117024	1	1	1	1
AT5G06970.1	AT5G06970.1		| Symbols: | Protein of unknown function (DUF810) | chr5:2158431-2166004 REVERSE LENGTH=1101	55.05	1	124523	1	1	1	1
AT3G57660.1	AT3G57660.1		| Symbols: NRPA1 | nuclear RNA polymerase A1 | chr3:21353746-21362814 FORWARD LENGTH=1670	52.33	0.9	187576	1	1	1	1
AT1G17260.1	AT1G17260.1; AT1G80660.1; AT1G80660.2; AT2G18960.1; AT3G42640.1; AT3G47950.1; AT4G30190.1; AT4G30190.2; AT5G57350.1; AT5G57350.2; AT5G62670.1		| Symbols: AHA10 | autoinhibited H(+)-ATPase isoform 10 | chr1:5904058-5908898 FORWARD LENGTH=947	49.73	1.58	104815	1	1	1	1
ATCG00490.1	ATCG00490.1		| Symbols: RBCL | ribulose-bisphosphate carboxylases | chrC:54958-56397 FORWARD LENGTH=479	48.17	2.09	52955	1	1	1	1
AT3G05060.1	AT3G05060.1; AT5G27120.1		| Symbols: | NOP56-like pre RNA processing ribonucleoprotein | chr3:1413174-1415564 REVERSE LENGTH=533	47.44	2.44	59003	1	1	1	1
AT3G15730.1	AT3G15730.1		| Symbols: PLDALPHA1, PLD | phospholipase D alpha 1 | chr3:5330835-5333474 FORWARD LENGTH=810	41.38	1.36	91848	1	1	1	1
AT3G57150.1	AT3G57150.1		| Symbols: NAP57, AtNAP57, CBF5, AtCBF5 | homologue of NAP57 | chr3:21154255-21155952 REVERSE LENGTH=565	40.8	1.59	63026	1	1	1	1
AT5G55920.1	AT5G55920.1		| Symbols: OLI2 | S-adenosyl-L-methionine-dependent methyltransferases superfamily protein | chr5:22645742-22649383 REVERSE LENGTH=682	38.72	1.61	76776	1	1	1	1
AT1G07920.1	AT1G07920.1; AT1G07930.1; AT1G07930.2; AT1G07940.1; AT1G07940.2; AT5G60390.1; AT5G60390.2; AT5G60390.3		| Symbols: | GTP binding Elongation factor Tu family protein | chr1:2455559-2457001 FORWARD LENGTH=449	35.11	2.45	49502	1	1	1	1
#C#P04264	#C#P04264	#C#H-INV:HIT000016045; #C#P05787; #C#Q6IFZ6; #C#Q8VED5; #C#Q9R0H5	SWISS-PROT:P04264 Tax_Id=9606 Gene_Symbol=KRT1 Keratin, type II cytoskeletal 1	1409.85	27.48	66018	19	15	19	15
#C#P13645	#C#P13645	#C#A2A5Y0; #C#A2AB72; #C#O76013; #C#O76014; #C#O76015; #C#P02535-1; #C#P05784; #C#P08730-1; #C#Q14525; #C#Q14532; #C#Q148H6; #C#Q15323; #C#Q2M2I5; #C#Q3ZAW8; #C#Q497I4; #C#Q7Z3Y7; #C#Q7Z3Y8; #C#Q7Z3Y9; #C#Q7Z3Z0; #C#Q92764; #C#Q99456; #C#Q9UE12; #C#Q9Z2K1; #C#REFSEQ:XP_986630	SWISS-PROT:P13645 Tax_Id=9606 Gene_Symbol=KRT10 Keratin, type I cytoskeletal 10	1212	32.04	59511	17	13	17	13
#C#P35908	#C#P35908	#C#O95678; #C#P07744; #C#P12035; #C#P19013; #C#P50446; #C#Q01546; #C#Q32MB2; #C#Q3TTY5; #C#Q5XKE5; #C#Q6NXH9; #C#Q7RTS7; #C#Q7RTT2; #C#Q8BGZ7; #C#Q8N1N4-2; #C#Q9R0H5; #C#REFSEQ:XP_932229	SWISS-PROT:P35908 Tax_Id=9606 Gene_Symbol=KRT2 Keratin, type II cytoskeletal 2 epidermal	813.46	23.57	65865	14	9	14	9
#C#P13647	#C#P13647	#C#H-INV:HIT000016045; #C#O95678; #C#P05787; #C#P07744; #C#P12035; #C#P50446; #C#Q01546; #C#Q32MB2; #C#Q5XKE5; #C#Q5XQN5; #C#Q7RTS7; #C#Q7RTT2; #C#Q8BGZ7; #C#Q8N1N4-2; #C#Q8VED5; #C#Q922U2; #C#REFSEQ:XP_932229	SWISS-PROT:P13647 Tax_Id=9606 Gene_Symbol=KRT5 Keratin, type II cytoskeletal 5	726.32	24.41	62378	13	9	13	9
#C#P02533	#C#P02533	#C#A2A4G1; #C#A2A5Y0; #C#A2AB72; #C#O76013; #C#O76014; #C#O76015; #C#P05784; #C#P08727; #C#P19001; #C#P19012; #C#Q04695; #C#Q14525; #C#Q14532; #C#Q15323; #C#Q3ZAW8; #C#Q497I4; #C#Q6IFX2; #C#Q7Z3Y9; #C#Q92764; #C#Q99456; #C#Q9QWL7; #C#Q9UE12; #C#Q9Z2K1; #C#REFSEQ:XP_986630	SWISS-PROT:P02533 Tax_Id=9606 Gene_Symbol=KRT14 Keratin, type I cytoskeletal 14	625.64	25.64	51622	10	3	10	3
#C#P08779	#C#P08779	#C#A2A4G1; #C#A2A5Y0; #C#A2AB72; #C#O76013; #C#O76014; #C#O76015; #C#P05784; #C#P08727; #C#P19001; #C#P19012; #C#Q14525; #C#Q14532; #C#Q15323; #C#Q3ZAW8; #C#Q497I4; #C#Q7Z3Y9; #C#Q92764; #C#Q99456; #C#Q9UE12; #C#Q9Z2K1; #C#REFSEQ:XP_986630	SWISS-PROT:P08779 Tax_Id=9606 Gene_Symbol=KRT16 Keratin, type I cytoskeletal 16	428.55	18.18	51268	8	1	8	1
#C#P35527	#C#P35527		SWISS-PROT:P35527 Tax_Id=9606 Gene_Symbol=KRT9 Keratin, type I cytoskeletal 9	409.07	12.52	62129	7	7	7	7
#C#Q9U6Y5	#C#Q9U6Y5		SWISS-PROT:Q9U6Y5 Green fluorescent protein (GFP-Cter-HisTag)	473.75	20.88	28107	6	6	7	7
#C#P02538	#C#P02538; #C#P04259; #C#P48668	#C#H-INV:HIT000016045; #C#O95678; #C#P05787; #C#P07744; #C#P12035; #C#P19013; #C#P50446; #C#Q01546; #C#Q32MB2; #C#Q5XKE5; #C#Q7RTS7; #C#Q7RTT2; #C#Q8BGZ7; #C#Q8N1N4-2; #C#Q8VED5; #C#REFSEQ:XP_932229	SWISS-PROT:P02538 Tax_Id=9606 Gene_Symbol=KRT6A Keratin, type II cytoskeletal 6A	271.41	8.33	60045	5	0	5	0
#C#ENSEMBL:ENSBTAP00000038253	#C#ENSEMBL:ENSBTAP00000038253	#C#P12035; #C#P19013; #C#Q5XKE5; #C#Q9R0H5; #C#REFSEQ:XP_932229	(Bos taurus) 63 kDa protein	243.55	6.77	63165	4	0	4	0
#C#P00761	#C#P00761		SWISS-PROT:P00761|TRYP_PIG Trypsin - Sus scrofa (Pig).	248.84	16.45	24409	3	3	3	3
#C#ENSEMBL:ENSP00000377550	#C#ENSEMBL:ENSP00000377550	#C#A2A5Y0; #C#A2AB72; #C#O76013; #C#O76014; #C#O76015; #C#P05784; #C#P13646-1; #C#Q14525; #C#Q14532; #C#Q15323; #C#Q2M2I5; #C#Q497I4; #C#Q92764; #C#Q9UE12; #C#REFSEQ:XP_986630	Tax_Id=9606 Gene_Symbol=KRT13 46 kDa protein	170.52	7.14	45771	3	0	3	0
#C#P62894	#C#P62894		SWISS-PROT:P62894 Cytochrome c - Bos taurus (Bovine).	158.15	31.43	11704	3	3	3	3
#C#Q7Z794	#C#Q7Z794	#C#Q9R0H5	SWISS-PROT:Q7Z794 Tax_Id=9606 Gene_Symbol=KRT77 Keratin 77	150.23	5.36	61802	3	2	3	2
#C#Q5D862	#C#Q5D862		SWISS-PROT:Q5D862 Tax_Id=9606 Gene_Symbol=FLG2 Filaggrin-2	122.57	1.05	248073	2	2	2	2
#C#P02769	#C#P02769		SWISS-PROT:P02769 (Bos taurus) Bovine serum albumin precursor	60.49	1.98	69293	1	1	1	1
#C#P20930	#C#P20930		SWISS-PROT:P20930 Tax_Id=9606 Gene_Symbol=FLG Filaggrin	50.75	0.2	435170	1	1	1	1
#C#P60712	#C#P60712		SWISS-PROT:P60712 (Bos taurus) Actin, cytoplasmic 1	48.29	2.93	41737	1	1	1	1
#C#P02768-1	#C#P02768-1		SWISS-PROT:P02768-1 Tax_Id=9606 Gene_Symbol=ALB Isoform 1 of Serum albumin precursor	47.84	1.97	69367	1	1	1	1
#C#P09870	#C#P09870		SWISS-PROT:P09870 Arg-C (Clostripain) - Clostridium histolyticum.	40.65	1.52	59733	1	1	1	1
#C#Q0VBK2	#C#Q0VBK2; #C#Q6KB66-1		TREMBL:Q0VBK2;Q8C1M7 Tax_Id=10090 Gene_Symbol=Krt80 Keratin 80	36.06	2.21	50660	1	1	1	1

## Sheet: experiment 2
accession	description	coverage	MW	protein_set_score	sequences	specific_sequences	peptides	specific_peptides
AT3G25610.1	| Symbols: | ATPase E1-E2 type family protein / haloacid dehalogenase-like hydrolase family protein | chr3:9308942-9313353 REVERSE LENGTH=1202	29.2	136279	1812.99	28	28	31	31
AT1G07660.1	| Symbols: | Histone superfamily protein | chr1:2369212-2369523 FORWARD LENGTH=103	38.83	11409	526.8	6	6	8	8
AT4G30190.1	| Symbols: AHA2, PMA2, HA2 | H(+)-ATPase 2 | chr4:14770820-14775920 REVERSE LENGTH=948	5.38	104401	198.94	4	4	4	4
ATCG00490.1	| Symbols: RBCL | ribulose-bisphosphate carboxylases | chrC:54958-56397 FORWARD LENGTH=479	6.26	52955	158.88	3	3	3	3
AT1G06950.1	| Symbols: ATTIC110, TIC110 | translocon at the inner envelope membrane of chloroplasts 110 | chr1:2130303-2135563 REVERSE LENGTH=1016	2.95	112121	95.12	2	2	2	2
AT1G52740.1	| Symbols: HTA9 | histone H2A protein 9 | chr1:19645409-19646221 FORWARD LENGTH=134	11.94	14272	82.58	2	2	2	2
AT1G67090.1	| Symbols: RBCS1A | ribulose bisphosphate carboxylase small chain 1A | chr1:25048465-25049249 REVERSE LENGTH=180	8.33	20216	78.35	2	2	2	2
AT1G78900.1	| Symbols: VHA-A | vacuolar ATP synthase subunit A | chr1:29660463-29664575 FORWARD LENGTH=623	3.37	68812	90.23	2	2	2	2
AT2G36160.1	| Symbols: | Ribosomal protein S11 family protein | chr2:15169925-15171159 FORWARD LENGTH=150	14	16257	115.31	1	1	2	2
AT3G62360.1	| Symbols: | Carbohydrate-binding-like fold | chr3:23073020-23080455 REVERSE LENGTH=1227	2.44	132944	106.97	2	2	2	2
AT1G06680.1	| Symbols: PSBP-1, OEE2, PSII-P, OE23 | photosystem II subunit P-1 | chr1:2047940-2049186 FORWARD LENGTH=263	3.8	28095	37.69	1	1	1	1
AT1G07170.1	| Symbols: | PHF5-like protein | chr1:2200686-2201018 FORWARD LENGTH=110	6.36	12429	42.27	1	1	1	1
AT1G07920.1	| Symbols: | GTP binding Elongation factor Tu family protein | chr1:2455559-2457001 FORWARD LENGTH=449	2	49502	41.91	1	1	1	1
AT1G09200.1	| Symbols: | Histone superfamily protein | chr1:2971722-2972132 REVERSE LENGTH=136	5.15	15268	48.43	1	1	1	1
AT1G12900.1	| Symbols: GAPA-2 | glyceraldehyde 3-phosphate dehydrogenase A subunit 2 | chr1:4392634-4394283 REVERSE LENGTH=399	3.76	42847	45.37	1	1	1	1
AT1G16300.1	| Symbols: GAPCP-2 | glyceraldehyde-3-phosphate dehydrogenase of plastid 2 | chr1:5574433-5577406 FORWARD LENGTH=420	3.57	44846	48.19	1	1	1	1
AT1G22530.1	| Symbols: PATL2 | PATELLIN 2 | chr1:7955773-7958326 REVERSE LENGTH=683	1.46	76008	56.72	1	1	1	1
AT1G23410.1	| Symbols: | Ribosomal protein S27a / Ubiquitin family protein | chr1:8314940-8315410 FORWARD LENGTH=156	10.26	17672	97.21	1	1	1	1
AT1G43170.1	| Symbols: ARP1, emb2207, RPL3A, RP1 | ribosomal protein 1 | chr1:16266992-16268631 FORWARD LENGTH=389	2.31	44559	65	1	1	1	1
AT1G56410.1	| Symbols: ERD2, HSP70T-1 | heat shock protein 70 (Hsp 70) family protein | chr1:21117147-21119241 FORWARD LENGTH=617	2.11	68357	83.1	1	1	1	1
AT1G62750.1	| Symbols: ATSCO1, ATSCO1/CPEF-G, SCO1 | Translation elongation factor EFG/EF2 protein | chr1:23233622-23236321 REVERSE LENGTH=783	2.3	86058	56.29	1	1	1	1
AT2G21390.1	| Symbols: | Coatomer, alpha subunit | chr2:9152428-9156577 FORWARD LENGTH=1218	1.15	136467	58.28	1	1	1	1
AT2G23070.1	| Symbols: | Protein kinase superfamily protein | chr2:9824162-9826871 REVERSE LENGTH=432	2.78	50236	40.27	1	1	1	1
AT3G08580.1	| Symbols: AAC1 | ADP/ATP carrier 1 | chr3:2605706-2607030 REVERSE LENGTH=381	2.89	41476	56.81	1	1	1	1
AT3G21055.1	| Symbols: PSBTN | photosystem II subunit T | chr3:7376761-7377072 REVERSE LENGTH=103	11.65	11028	40.09	1	1	1	1
AT3G27830.1	| Symbols: RPL12-A, RPL12 | ribosomal protein L12-A | chr3:10318576-10319151 FORWARD LENGTH=191	7.33	20075	37.57	1	1	1	1
AT3G46040.1	| Symbols: RPS15AD | ribosomal protein S15A D | chr3:16914891-16915529 FORWARD LENGTH=130	15.38	14774	100.58	1	1	1	1
AT3G47070.1	| Symbols: | LOCATED IN: thylakoid, chloroplast thylakoid membrane, chloroplast, chloroplast envelope; EXPRESSED IN: 22 plant structures; EXPRESSED DURING: 13 growth stages; CONTAINS InterPro DOMAIN/s: Thylakoid soluble phosphoprotein TSP9 (InterPr	12	10530	69.4	1	1	1	1
AT3G49010.1	| Symbols: ATBBC1, BBC1, RSU2 | breast basic conserved 1 | chr3:18166971-18168047 REVERSE LENGTH=206	5.34	23767	85.26	1	1	1	1
AT3G50820.1	| Symbols: PSBO2, PSBO-2, OEC33 | photosystem II subunit O-2 | chr3:18891008-18892311 REVERSE LENGTH=331	3.63	35019	46.81	1	1	1	1
AT3G56070.1	| Symbols: ROC2 | rotamase cyclophilin 2 | chr3:20806987-20807517 REVERSE LENGTH=176	7.95	18921	59.65	1	1	1	1
AT4G05180.1	| Symbols: PSBQ, PSBQ-2, PSII-Q | photosystem II subunit Q-2 | chr4:2672093-2673170 REVERSE LENGTH=230	5.65	24643	49.89	1	1	1	1
AT4G20360.1	| Symbols: ATRAB8D, ATRABE1B, RABE1b | RAB GTPase homolog E1B | chr4:10990036-10991466 FORWARD LENGTH=476	2.52	51630	41.08	1	1	1	1
AT5G10470.1	| Symbols: KCA1, KAC1 | kinesin like protein for actin based chloroplast movement 1 | chr5:3290121-3297248 REVERSE LENGTH=1273	1.02	141036	44.91	1	1	1	1
AT5G22640.1	| Symbols: emb1211 | MORN (Membrane Occupation and Recognition Nexus) repeat-containing protein | chr5:7529423-7533641 FORWARD LENGTH=871	1.49	99954	41.27	1	1	1	1
AT5G64040.1	| Symbols: PSAN | photosystem I reaction center subunit PSI-N, chloroplast, putative / PSI-N, putative (PSAN) | chr5:25628724-25629409 REVERSE LENGTH=171	5.85	18429	38.17	1	1	1	1
AT5G64140.1	| Symbols: RPS28 | ribosomal protein S28 | chr5:25667529-25667723 REVERSE LENGTH=64	23.44	7341	47.02	1	1	1	1
#C#P04264	SWISS-PROT:P04264 Tax_Id=9606 Gene_Symbol=KRT1 Keratin, type II cytoskeletal 1	42.39	66018	2095.39	25	19	28	22
#C#P35908	SWISS-PROT:P35908 Tax_Id=9606 Gene_Symbol=KRT2 Keratin, type II cytoskeletal 2 epidermal	40.31	65865	1549	22	13	23	14
#C#P35527	SWISS-PROT:P35527 Tax_Id=9606 Gene_Symbol=KRT9 Keratin, type I cytoskeletal 9	49.12	62129	1542.09	18	18	22	22
#C#P13645	SWISS-PROT:P13645 Tax_Id=9606 Gene_Symbol=KRT10 Keratin, type I cytoskeletal 10	26.31	59511	1316.01	20	15	20	15
#C#P13647	SWISS-PROT:P13647 Tax_Id=9606 Gene_Symbol=KRT5 Keratin, type II cytoskeletal 5	33.05	62378	1048.18	20	4	20	4
#C#P02538	SWISS-PROT:P02538 Tax_Id=9606 Gene_Symbol=KRT6A Keratin, type II cytoskeletal 6A	24.29	60045	864.79	13	1	13	1
#C#P02769	SWISS-PROT:P02769 (Bos taurus) Bovine serum albumin precursor	23.39	69293	768.7	13	11	13	11
#C#P04259	SWISS-PROT:P04259 Tax_Id=9606 Gene_Symbol=KRT6B Keratin, type II cytoskeletal 6B	22.52	59999	806.59	13	1	13	1
#C#P48668	SWISS-PROT:P48668 Tax_Id=9606 Gene_Symbol=KRT6C Keratin, type II cytoskeletal 6C	22.52	60025	836.96	13	0	13	0
#C#Q5XQN5	SWISS-PROT:Q5XQN5 (Bos taurus) Keratin, type II cytoskeletal 5	20.47	62937	660.4	13	0	13	0
#C#P02533	SWISS-PROT:P02533 Tax_Id=9606 Gene_Symbol=KRT14 Keratin, type I cytoskeletal 14	24.36	51622	598.58	9	4	9	4
#C#P08779	SWISS-PROT:P08779 Tax_Id=9606 Gene_Symbol=KRT16 Keratin, type I cytoskeletal 16	22.83	51268	519.86	8	3	8	3
#C#O95678	SWISS-PROT:O95678 Tax_Id=9606 Gene_Symbol=KRT75 Keratin, type II cytoskeletal 75	11.8	59504	369.71	7	0	7	0
#C#P12035	SWISS-PROT:P12035 Tax_Id=9606 Gene_Symbol=KRT3 Keratin, type II cytoskeletal 3	9.86	64504	399.38	7	0	7	0
#C#P50446	SWISS-PROT:P50446 Tax_Id=10090 Gene_Symbol=Krt6a Keratin, type II cytoskeletal 6A	11.21	59335	419.65	7	0	7	0
#C#Q5XKE5	SWISS-PROT:Q5XKE5 Tax_Id=9606 Gene_Symbol=KRT79 Keratin, type II cytoskeletal 79	11.59	57810	368.97	7	0	7	0
#C#Q9U6Y5	SWISS-PROT:Q9U6Y5 Green fluorescent protein (GFP-Cter-HisTag)	22.09	28107	373.99	7	7	7	7
#C#Q8BGZ7	TREMBL:Q8BGZ7;Q99MH7 Tax_Id=10090 Gene_Symbol=Krt75 10 days neonate skin cDNA, RIKEN full-length enriched library, clone:4732475I03 product:CYTOKERATIN homolog	9.07	59741	355.94	6	0	6	0
#C#A2A4G1	TREMBL:A2A4G1 Tax_Id=10090 Gene_Symbol=Krt15 Keratin complex 1, acidic, gene 15	10.31	49494	248.22	5	0	5	0
#C#P00761	SWISS-PROT:P00761|TRYP_PIG Trypsin - Sus scrofa (Pig).	31.17	24409	357.18	5	5	5	5
#C#P08730-1	SWISS-PROT:P08730-1 Tax_Id=10090 Gene_Symbol=Krt13 Isoform 1 of Keratin, type I cytoskeletal 13	9.38	47754	266.02	5	0	5	0
#C#ENSEMBL:ENSBTAP00000038253	(Bos taurus) 63 kDa protein	6.11	63165	291.61	4	0	4	0
#C#P62894	SWISS-PROT:P62894 Cytochrome c - Bos taurus (Bovine).	32.38	11704	242.01	4	4	4	4
#C#P02768-1	SWISS-PROT:P02768-1 Tax_Id=9606 Gene_Symbol=ALB Isoform 1 of Serum albumin precursor	4.11	69367	182.56	3	1	3	1
#C#P60712	SWISS-PROT:P60712 (Bos taurus) Actin, cytoplasmic 1	7.47	41737	125.9	2	2	2	2
#C#Q7RTT2	TREMBL:Q7RTT2 Tax_Id=9606 Gene_Symbol=KRT78 Keratin-78	4.8	56965	125.53	2	1	2	1
#C#P02668	SWISS-PROT:P02668 Kappa-casein [Contains: Casoxin C; Casoxin 6; Casoxin A; Casoxin B; Casoplatelin] - Bos taurus (Bovine).	5.92	18974	42.94	1	1	1	1
#C#P02754	SWISS-PROT:P02754 Beta-lactoglobulin - Bos taurus (Bovine).	8.64	18281	52.02	1	1	1	1

## Sheet: experiment 3
accession	samesets_accessions	subsets_accessions	description	protein_set_score	sequences	specific_sequences	peptides	specific_peptides
AT3G25610.1	AT3G25610.1	AT1G13210.1; AT1G26130.1; AT1G26130.2; AT1G68710.1	| Symbols: | ATPase E1-E2 type family protein / haloacid dehalogenase-like hydrolase family protein | chr3:9308942-9313353 REVERSE LENGTH=1202	3263.06	45	45	50	50
AT3G57660.1	AT3G57660.1	AT5G60040.1; AT5G60040.2	| Symbols: NRPA1 | nuclear RNA polymerase A1 | chr3:21353746-21362814 FORWARD LENGTH=1670	2421.79	35	35	38	38
AT2G38770.1	AT2G38770.1		| Symbols: EMB2765 | P-loop containing nucleoside triphosphate hydrolases superfamily protein | chr2:16203185-16210253 REVERSE LENGTH=1509	940.72	16	16	18	18
AT5G06970.1	AT5G06970.1		| Symbols: | Protein of unknown function (DUF810) | chr5:2158431-2166004 REVERSE LENGTH=1101	488.42	7	7	9	9
AT1G20960.1	AT1G20960.1; AT1G20960.2	AT2G42270.1	| Symbols: emb1507 | U5 small nuclear ribonucleoprotein helicase, putative | chr1:7302591-7309914 REVERSE LENGTH=2171	370.29	7	7	7	7
AT3G11130.1	AT3G11130.1	AT3G08530.1	| Symbols: | Clathrin, heavy chain | chr3:3482575-3491667 REVERSE LENGTH=1705	235.5	5	5	5	5
AT5G15970.1	AT5G15970.1		| Symbols: KIN2, COR6.6 | stress-responsive protein (KIN2) / stress-induced protein (KIN2) / cold-responsive protein (COR6.6) / cold-regulated protein (COR6.6) | chr5:5211966-5212441 FORWARD LENGTH=66	253.56	4	4	4	4
AT1G56110.1	AT1G56110.1	AT3G12860.1	| Symbols: NOP56 | homolog of nucleolar protein NOP56 | chr1:20984544-20986893 REVERSE LENGTH=522	243.23	4	4	4	4
AT2G18960.1	AT2G18960.1; AT4G30190.1; AT4G30190.2	AT1G17260.1; AT1G80660.1; AT1G80660.2; AT2G24520.1; AT3G42640.1; AT3G47950.1; AT3G60330.1; AT3G60330.2; AT5G57350.1; AT5G57350.2; AT5G62670.1	| Symbols: AHA1, PMA, OST2, HA1 | H(+)-ATPase 1 | chr2:8221858-8227268 FORWARD LENGTH=949	209.26	4	4	4	4
AT1G23410.1	AT1G23410.1; AT1G31340.1; AT1G55060.1; AT1G65350.1; AT2G35635.1; AT2G36170.1; AT2G47110.1; AT2G47110.2; AT3G09790.1; AT3G52590.1; AT3G62250.1; AT4G02890.1; AT4G02890.2; AT4G02890.3; AT4G02890.4; AT4G05050.1; AT4G05050.2; AT4G05050.3; AT4G05050.4; AT4G05320.1; AT4G05320.2; AT4G05320.3; AT4G05320.4; AT4G05320.5; AT4G05320.6; AT5G03240.1; AT5G03240.2; AT5G03240.3; AT5G20620.1; AT5G37640.1		| Symbols: | Ribosomal protein S27a / Ubiquitin family protein | chr1:8314940-8315410 FORWARD LENGTH=156	204.29	4	4	4	4
AT3G52140.1	AT3G52140.1; AT3G52140.2; AT3G52140.3; AT3G52140.4		| Symbols: | tetratricopeptide repeat (TPR)-containing protein | chr3:19333232-19341295 FORWARD LENGTH=1403	200.61	3	3	3	3
AT4G03550.1	AT4G03550.1		| Symbols: ATGSL05, GSL05, ATGSL5, PMR4, GSL5 | glucan synthase-like 5 | chr4:1573513-1579195 FORWARD LENGTH=1780	178.82	3	3	3	3
AT2G27720.1	AT2G27720.1; AT2G27720.2; AT2G27720.3	AT2G27710.4	| Symbols: | 60S acidic ribosomal protein family | chr2:11818696-11819370 FORWARD LENGTH=115	178.76	3	2	3	2
AT5G64420.1	AT5G64420.1		| Symbols: | DNA polymerase V family | chr5:25756416-25761122 FORWARD LENGTH=1306	172.64	3	3	3	3
AT3G06530.1	AT3G06530.1; AT3G06530.2; AT3G06530.3		| Symbols: | ARM repeat superfamily protein | chr3:2022596-2033637 FORWARD LENGTH=2197	148.65	2	2	2	2
AT4G21280.1	AT4G21280.1	AT4G21280.2	| Symbols: PSBQ, PSBQA, PSBQ-1 | photosystem II subunit QA | chr4:11334446-11335587 FORWARD LENGTH=223	144.59	2	2	2	2
AT3G05680.1	AT3G05680.1; AT3G05680.2		| Symbols: EMB2016 | embryo defective 2016 | chr3:1660802-1672015 REVERSE LENGTH=2138	144.2	2	2	2	2
AT1G66850.1	AT1G66850.1		| Symbols: | Bifunctional inhibitor/lipid-transfer protein/seed storage 2S albumin superfamily protein | chr1:24936985-24937293 FORWARD LENGTH=102	134.2	2	2	2	2
AT5G64270.1	AT5G64270.1		| Symbols: | splicing factor, putative | chr5:25706909-25710718 FORWARD LENGTH=1269	131.17	2	2	2	2
AT3G61130.1	AT3G61130.1		| Symbols: GAUT1, LGT1 | galacturonosyltransferase 1 | chr3:22622399-22625514 FORWARD LENGTH=673	129.45	2	2	2	2
AT5G52470.1	AT5G52470.1; AT5G52470.2	AT4G25630.1	| Symbols: FIB1, FBR1, ATFIB1, ATFBR1, SKIP7 | fibrillarin 1 | chr5:21294290-21296509 FORWARD LENGTH=308	123.14	2	2	2	2
AT5G64040.1	AT5G64040.1; AT5G64040.2		| Symbols: PSAN | photosystem I reaction center subunit PSI-N, chloroplast, putative / PSI-N, putative (PSAN) | chr5:25628724-25629409 REVERSE LENGTH=171	121.23	2	2	2	2
AT3G05060.1	AT3G05060.1		| Symbols: | NOP56-like pre RNA processing ribonucleoprotein | chr3:1413174-1415564 REVERSE LENGTH=533	119.31	2	2	2	2
AT3G50820.1	AT3G50820.1; AT5G66570.1		| Symbols: PSBO2, PSBO-2, OEC33 | photosystem II subunit O-2 | chr3:18891008-18892311 REVERSE LENGTH=331	115	2	2	2	2
AT1G07660.1	AT1G07660.1; AT1G07820.1; AT1G07820.2; AT2G28740.1; AT3G45930.1; AT3G46320.1; AT3G53730.1; AT5G59690.1; AT5G59970.1	AT1G07660.2	| Symbols: | Histone superfamily protein | chr1:2369212-2369523 FORWARD LENGTH=103	113.41	2	2	2	2
ATCG00490.1	ATCG00490.1		| Symbols: RBCL | ribulose-bisphosphate carboxylases | chrC:54958-56397 FORWARD LENGTH=479	107.19	2	2	2	2
AT3G12580.1	AT3G12580.1	AT1G56410.1; AT3G09440.1; AT3G09440.2; AT5G02490.1; AT5G02500.1; AT5G02500.2	| Symbols: HSP70, ATHSP70 | heat shock protein 70 | chr3:3991487-3993689 REVERSE LENGTH=650	105.4	2	2	2	2
AT3G11964.1	AT3G11964.1		| Symbols: | RNA binding;RNA binding | chr3:3793957-3806626 REVERSE LENGTH=1896	105.22	2	2	2	2
AT3G27830.1	AT3G27830.1; AT3G27850.1		| Symbols: RPL12-A, RPL12 | ribosomal protein L12-A | chr3:10318576-10319151 FORWARD LENGTH=191	103.62	2	2	2	2
AT3G08770.1	AT3G08770.1; AT3G08770.2		| Symbols: LTP6 | lipid transfer protein 6 | chr3:2664349-2664784 REVERSE LENGTH=113	100.86	2	2	2	2
AT2G47000.1	AT2G47000.1	AT3G62150.1	| Symbols: MDR4, PGP4, ABCB4, ATPGP4 | ATP binding cassette subfamily B4 | chr2:19310008-19314750 REVERSE LENGTH=1286	100.62	2	2	2	2
AT5G46020.1	AT5G46020.1		| Symbols: | CONTAINS InterPro DOMAIN/s: Casein kinase substrate, phosphoprotein PP28 (InterPro:IPR019380); Has 30201 Blast hits to 17322 proteins in 780 species: Archae - 12; Bacteria - 1396; Metazoa - 17338; Fungi - 3422; Plants - 5037; Viruses -	99.68	2	2	2	2
AT2G27710.1	AT2G27710.1; AT2G27710.2; AT2G27710.3	AT2G27710.4	| Symbols: | 60S acidic ribosomal protein family | chr2:11816929-11817670 FORWARD LENGTH=115	96.68	2	1	2	1
AT4G31570.1	AT4G31570.1		| Symbols: | CONTAINS InterPro DOMAIN/s: Prefoldin (InterPro:IPR009053); BEST Arabidopsis thaliana protein match is: unknown protein (TAIR:AT1G24460.1); Has 194354 Blast hits to 66887 proteins in 3244 species: Archae - 3688; Bacteria - 38556; Metaz	94.52	2	2	2	2
AT4G05180.1	AT4G05180.1		| Symbols: PSBQ, PSBQ-2, PSII-Q | photosystem II subunit Q-2 | chr4:2672093-2673170 REVERSE LENGTH=230	93.95	2	2	2	2
ATCG01130.1	ATCG01130.1		| Symbols: YCF1.2 | Ycf1 protein | chrC:123884-129244 REVERSE LENGTH=1786	90.4	2	2	2	2
AT1G67090.1	AT1G67090.1	AT1G67090.2; AT5G38410.1; AT5G38410.2; AT5G38410.3; AT5G38420.1; AT5G38430.1	| Symbols: RBCS1A | ribulose bisphosphate carboxylase small chain 1A | chr1:25048465-25049249 REVERSE LENGTH=180	85.77	2	2	2	2
AT4G13560.1	AT4G13560.1		| Symbols: UNE15 | Late embryogenesis abundant protein (LEA) family protein | chr4:7879764-7880311 REVERSE LENGTH=109	79.84	2	2	2	2
AT2G36850.1	AT2G36850.1	AT3G07160.1	| Symbols: ATGSL08, GSL8, GSL08, ATGSL8, CHOR | glucan synthase-like 8 | chr2:15454935-15469666 REVERSE LENGTH=1904	78.41	2	2	2	2
AT4G35100.1	AT4G35100.1; AT4G35100.2		| Symbols: PIP3, PIP3A, PIP2;7, SIMIP | plasma membrane intrinsic protein 3 | chr4:16708672-16709958 FORWARD LENGTH=280	86.29	1	1	1	1
AT2G24020.1	AT2G24020.1; AT2G24020.2; AT4G30620.1		| Symbols: | Uncharacterised BCR, YbaB family COG0718 | chr2:10217869-10219269 REVERSE LENGTH=182	85.31	1	1	1	1
ATCG01060.1	ATCG01060.1		| Symbols: PSAC | iron-sulfur cluster binding;electron carriers;4 iron, 4 sulfur cluster binding | chrC:117318-117563 REVERSE LENGTH=81	81.76	1	1	1	1
AT5G38760.1	AT5G38760.1		| Symbols: | Late embryogenesis abundant protein (LEA) family protein | chr5:15524249-15524743 FORWARD LENGTH=67	79.7	1	1	1	1
AT5G53820.1	AT5G53820.1		| Symbols: | Late embryogenesis abundant protein (LEA) family protein | chr5:21853475-21853866 FORWARD LENGTH=67	76.83	1	1	1	1
AT1G54410.1	AT1G54410.1		| Symbols: | dehydrin family protein | chr1:20310305-20310601 REVERSE LENGTH=98	69.91	1	1	1	1
ATCG00280.1	ATCG00280.1		| Symbols: PSBC | photosystem II reaction center protein C | chrC:33720-35141 FORWARD LENGTH=473	65.8	1	1	1	1
AT3G56070.1	AT3G56070.1; AT3G56070.2		| Symbols: ROC2 | rotamase cyclophilin 2 | chr3:20806987-20807517 REVERSE LENGTH=176	64.87	1	1	1	1
AT1G12310.1	AT1G12310.1		| Symbols: | Calcium-binding EF-hand family protein | chr1:4187500-4187946 REVERSE LENGTH=148	62.84	1	1	1	1
AT3G25220.1	AT3G25220.1; AT5G48580.1		| Symbols: FKBP15-1 | FK506-binding protein 15 kD-1 | chr3:9182691-9184463 FORWARD LENGTH=153	61.45	1	1	1	1
AT2G03440.1	AT2G03440.1		| Symbols: NRP1, ATNRP1 | nodulin-related protein 1 | chr2:1039409-1039972 REVERSE LENGTH=187	60.96	1	1	1	1
AT3G47070.1	AT3G47070.1		| Symbols: | LOCATED IN: thylakoid, chloroplast thylakoid membrane, chloroplast, chloroplast envelope; EXPRESSED IN: 22 plant structures; EXPRESSED DURING: 13 growth stages; CONTAINS InterPro DOMAIN/s: Thylakoid soluble phosphoprotein TSP9 (InterPr	59.91	1	1	1	1
AT3G12390.1	AT3G12390.1		| Symbols: | Nascent polypeptide-associated complex (NAC), alpha subunit family protein | chr3:3942344-3943595 FORWARD LENGTH=203	54.71	1	1	1	1
AT3G52300.1	AT3G52300.1; AT3G52300.2		| Symbols: ATPQ | ATP synthase D chain, mitochondrial | chr3:19396689-19398119 FORWARD LENGTH=168	54.44	1	1	1	1
AT1G29910.1	AT1G29910.1; AT1G29920.1; AT1G29930.1; AT2G34420.1		| Symbols: CAB3, AB180, LHCB1.2 | chlorophyll A/B binding protein 3 | chr1:10472443-10473246 REVERSE LENGTH=267	53.05	1	1	1	1
AT3G49010.1	AT3G49010.1; AT3G49010.2; AT3G49010.3; AT3G49010.4		| Symbols: ATBBC1, BBC1, RSU2 | breast basic conserved 1 | chr3:18166971-18168047 REVERSE LENGTH=206	50.93	1	1	1	1
AT4G00860.1	AT4G00860.1		| Symbols: ATOZI1, AT0ZI1 | Protein of unknown function (DUF1138) | chr4:359548-359868 REVERSE LENGTH=80	48.91	1	1	1	1
AT1G07920.1	AT1G07920.1; AT1G07930.1; AT1G07930.2; AT1G07940.1; AT1G07940.2; AT5G60390.1; AT5G60390.2; AT5G60390.3		| Symbols: | GTP binding Elongation factor Tu family protein | chr1:2455559-2457001 FORWARD LENGTH=449	48.39	1	1	1	1
AT3G21055.1	AT3G21055.1		| Symbols: PSBTN | photosystem II subunit T | chr3:7376761-7377072 REVERSE LENGTH=103	48.38	1	1	1	1
AT3G09500.1	AT3G09500.1; AT3G55170.1; AT3G55170.2		| Symbols: | Ribosomal L29 family protein | chr3:2917047-2917895 FORWARD LENGTH=123	48.28	1	1	1	1
AT4G20260.1	AT4G20260.1; AT4G20260.2; AT4G20260.3; AT4G20260.4; AT4G20260.5; AT4G20260.6		| Symbols: ATPCAP1, PCAP1 | plasma-membrane associated cation-binding protein 1 | chr4:10941593-10943227 FORWARD LENGTH=225	47.63	1	1	1	1
AT1G09200.1	AT1G09200.1; AT1G75600.1; AT3G27360.1; AT4G40030.1; AT4G40030.2; AT4G40030.3; AT4G40040.1; AT4G40040.2; AT5G10390.1; AT5G10400.1; AT5G10980.1; AT5G65360.1		| Symbols: | Histone superfamily protein | chr1:2971722-2972132 REVERSE LENGTH=136	46.75	1	1	1	1
AT1G30360.1	AT1G30360.1		| Symbols: ERD4 | Early-responsive to dehydration stress protein (ERD4) | chr1:10715892-10718799 FORWARD LENGTH=724	45.23	1	1	1	1
AT5G15960.1	AT5G15960.1		| Symbols: KIN1 | stress-responsive protein (KIN1) / stress-induced protein (KIN1) | chr5:5209992-5210473 FORWARD LENGTH=66	45.09	1	1	1	1
AT5G39570.1	AT5G39570.1		| Symbols: | FUNCTIONS IN: molecular_function unknown; INVOLVED IN: biological_process unknown; LOCATED IN: cytosol, nucleus; EXPRESSED IN: 25 plant structures; EXPRESSED DURING: 14 growth stages; BEST Arabidopsis thaliana protein match is: glycine	43.83	1	1	1	1
AT1G08880.1	AT1G08880.1; AT1G51060.1; AT1G52740.1; AT1G54690.1; AT3G20670.1; AT4G27230.1; AT4G27230.2; AT5G27670.1; AT5G54640.1; AT5G59870.1		| Symbols: HTA5, H2AXA, G-H2AX, GAMMA-H2AX | Histone superfamily protein | chr1:2847144-2847676 REVERSE LENGTH=142	43.28	1	1	1	1
AT1G01320.1	AT1G01320.1; AT1G01320.2; AT1G15290.1; AT4G28080.1		| Symbols: | Tetratricopeptide repeat (TPR)-like superfamily protein | chr1:121582-130099 REVERSE LENGTH=1797	42.62	1	1	1	1
AT3G12740.1	AT3G12740.1		| Symbols: ALIS1 | ALA-interacting subunit 1 | chr3:4049739-4051561 FORWARD LENGTH=350	42.52	1	1	1	1
AT2G19750.1	AT2G19750.1; AT4G29390.1; AT5G56670.1		| Symbols: | Ribosomal protein S30 family protein | chr2:8515037-8515806 FORWARD LENGTH=62	41.89	1	1	1	1
AT1G14320.1	AT1G14320.1; AT1G14320.2; AT1G26910.1; AT1G66580.1		| Symbols: SAC52, RPL10, RPL10A | Ribosomal protein L16p/L10e family protein | chr1:4888270-4889408 FORWARD LENGTH=220	41.6	1	1	1	1
AT4G38970.1	AT4G38970.1; AT4G38970.2		| Symbols: FBA2 | fructose-bisphosphate aldolase 2 | chr4:18163714-18165659 REVERSE LENGTH=398	40.82	1	1	1	1
AT2G32240.1	AT2G32240.1		| Symbols: | FUNCTIONS IN: molecular_function unknown; INVOLVED IN: response to cadmium ion; LOCATED IN: plasma membrane; EXPRESSED IN: 25 plant structures; EXPRESSED DURING: 13 growth stages; CONTAINS InterPro DOMAIN/s: Prefoldin (InterPro:IPR0090	39.86	1	1	1	1
AT3G05590.1	AT3G05590.1; AT5G27850.1		| Symbols: RPL18 | ribosomal protein L18 | chr3:1621511-1622775 FORWARD LENGTH=187	39.69	1	1	1	1
AT3G23810.1	AT3G23810.1; AT4G13940.1; AT4G13940.2; AT4G13940.3; AT4G13940.4		| Symbols: SAHH2, ATSAHH2 | S-adenosyl-l-homocysteine (SAH) hydrolase 2 | chr3:8588013-8589671 REVERSE LENGTH=485	38.18	1	1	1	1
AT3G26060.1	AT3G26060.1; AT3G26060.2		| Symbols: ATPRX Q | Thioredoxin superfamily protein | chr3:9524807-9526123 FORWARD LENGTH=216	37.51	1	1	1	1
AT1G48920.1	AT1G48920.1		| Symbols: ATNUC-L1, PARL1, NUC-L1 | nucleolin like 1 | chr1:18098186-18101422 FORWARD LENGTH=557	36.81	1	1	1	1
AT1G43170.1	AT1G43170.1; AT1G43170.2; AT1G43170.3; AT1G43170.4; AT1G43170.5; AT1G43170.6; AT1G43170.7; AT1G43170.8; AT1G43170.9		| Symbols: ARP1, emb2207, RPL3A, RP1 | ribosomal protein 1 | chr1:16266992-16268631 FORWARD LENGTH=389	36.05	1	1	1	1
AT3G08580.1	AT3G08580.1; AT3G08580.2; AT4G28390.1		| Symbols: AAC1 | ADP/ATP carrier 1 | chr3:2605706-2607030 REVERSE LENGTH=381	34.99	1	1	1	1
AT1G54320.1	AT1G54320.1		| Symbols: | LEM3 (ligand-effect modulator 3) family protein / CDC50 family protein | chr1:20275732-20277793 REVERSE LENGTH=349	34.82	1	1	1	1
AT1G03680.1	AT1G03680.1		| Symbols: ATHM1, TRX-M1, ATM1, THM1 | thioredoxin M-type 1 | chr1:916990-917865 REVERSE LENGTH=179	34.76	1	1	1	1
AT1G15210.1	AT1G15210.1; AT1G59870.1; AT3G16340.1		| Symbols: PDR7, ATPDR7 | pleiotropic drug resistance 7 | chr1:5231552-5236573 REVERSE LENGTH=1442	34.53	1	1	1	1
ATCG00900.1	ATCG00900.1; ATCG01240.1		| Symbols: RPS7.1, RPS7 | Ribosomal protein S7p/S5e family protein | chrC:97478-97945 REVERSE LENGTH=155	34.3	1	1	1	1
AT4G31700.1	AT4G31700.1; AT5G10360.1; AT5G10360.2		| Symbols: RPS6, RPS6A | ribosomal protein S6 | chr4:15346306-15347714 REVERSE LENGTH=250	34.21	1	1	1	1
#C#P04264	#C#P04264		SWISS-PROT:P04264 Tax_Id=9606 Gene_Symbol=KRT1 Keratin, type II cytoskeletal 1	3154.15	34	32	38	36
#C#P13645	#C#P13645	#C#A2A5Y0; #C#A2AB72; #C#O76013; #C#O76014; #C#O76015; #C#P02535-1; #C#P05784; #C#Q14525; #C#Q14532; #C#Q148H6; #C#Q15323; #C#Q2M2I5; #C#Q497I4; #C#Q7Z3Y7; #C#Q7Z3Y8; #C#Q7Z3Y9; #C#Q7Z3Z0; #C#Q92764; #C#Q99456; #C#Q9UE12; #C#REFSEQ:XP_986630	SWISS-PROT:P13645 Tax_Id=9606 Gene_Symbol=KRT10 Keratin, type I cytoskeletal 10	1737.26	25	21	25	21
#C#P35527	#C#P35527		SWISS-PROT:P35527 Tax_Id=9606 Gene_Symbol=KRT9 Keratin, type I cytoskeletal 9	1611.47	20	20	24	24
#C#P35908	#C#P35908	#C#P05787; #C#P07744; #C#P08729; #C#Q01546; #C#Q14CN4-1; #C#Q32MB2; #C#Q3KNV1; #C#Q3SY84; #C#Q5XKE5; #C#Q6IFZ6; #C#Q6IME9; #C#Q6ISB0; #C#Q6NXH9; #C#Q7RTS7; #C#Q7Z794; #C#Q8VED5; #C#Q9DCV7; #C#Q9NSB2; #C#Q9R0H5; #C#REFSEQ:XP_932229	SWISS-PROT:P35908 Tax_Id=9606 Gene_Symbol=KRT2 Keratin, type II cytoskeletal 2 epidermal	1423.08	23	18	23	18
#C#P08779	#C#P08779	#C#A2A4G1; #C#A2A5Y0; #C#A2AB72; #C#O76013; #C#O76014; #C#O76015; #C#P05784; #C#P08727; #C#P19001; #C#P19012; #C#P35900; #C#Q14525; #C#Q14532; #C#Q15323; #C#Q3ZAW8; #C#Q497I4; #C#Q61782; #C#Q7Z3Y9; #C#Q8N1A0; #C#Q92764; #C#Q99456; #C#Q9D312; #C#Q9UE12; #C#Q9Z2K1; #C#REFSEQ:XP_986630	SWISS-PROT:P08779 Tax_Id=9606 Gene_Symbol=KRT16 Keratin, type I cytoskeletal 16	1596.49	21	8	22	9
#C#P02533	#C#P02533	#C#A2A4G1; #C#A2A5Y0; #C#A2AB72; #C#O76013; #C#O76014; #C#O76015; #C#P05784; #C#P08727; #C#P19001; #C#P19012; #C#P35900; #C#Q14525; #C#Q14532; #C#Q15323; #C#Q497I4; #C#Q61782; #C#Q6IFX2; #C#Q7Z3Y9; #C#Q8N1A0; #C#Q92764; #C#Q99456; #C#Q9D312; #C#Q9QWL7; #C#Q9UE12; #C#REFSEQ:XP_986630	SWISS-PROT:P02533 Tax_Id=9606 Gene_Symbol=KRT14 Keratin, type I cytoskeletal 14	1326.15	19	4	19	4
#C#P02769	#C#P02769		SWISS-PROT:P02769 (Bos taurus) Bovine serum albumin precursor	1182.59	19	16	19	16
#C#P02538	#C#P02538	#C#O95678; #C#P05787; #C#P07744; #C#P08729; #C#P50446; #C#Q14CN4-1; #C#Q32MB2; #C#Q3KNV1; #C#Q3SY84; #C#Q6IME9; #C#Q6ISB0; #C#Q7RTS7; #C#Q8BGZ7; #C#Q8VED5; #C#Q9DCV7; #C#Q9NSB2; #C#REFSEQ:XP_932229	SWISS-PROT:P02538 Tax_Id=9606 Gene_Symbol=KRT6A Keratin, type II cytoskeletal 6A	1132.68	16	3	16	3
#C#P04259	#C#P04259	#C#O95678; #C#P05787; #C#P07744; #C#P08729; #C#P50446; #C#Q14CN4-1; #C#Q32MB2; #C#Q3KNV1; #C#Q3SY84; #C#Q6IME9; #C#Q6ISB0; #C#Q7RTS7; #C#Q8BGZ7; #C#Q8VED5; #C#Q9DCV7; #C#Q9NSB2; #C#REFSEQ:XP_932229	SWISS-PROT:P04259 Tax_Id=9606 Gene_Symbol=KRT6B Keratin, type II cytoskeletal 6B	995.84	15	2	15	2
#C#Q9U6Y5	#C#Q9U6Y5		SWISS-PROT:Q9U6Y5 Green fluorescent protein (GFP-Cter-HisTag)	686.28	10	10	11	11
#C#P13647	#C#P13647	#C#P05787; #C#P07744; #C#P08729; #C#Q14CN4-1; #C#Q32MB2; #C#Q3KNV1; #C#Q3SY84; #C#Q5XQN5; #C#Q6IME9; #C#Q6ISB0; #C#Q7RTS7; #C#Q8VED5; #C#Q922U2; #C#Q9DCV7; #C#Q9NSB2; #C#REFSEQ:XP_932229	SWISS-PROT:P13647 Tax_Id=9606 Gene_Symbol=KRT5 Keratin, type II cytoskeletal 5	607.69	11	6	11	6
#C#Q04695	#C#Q04695	#C#A2A5Y0; #C#A2AB72; #C#O76013; #C#O76014; #C#O76015; #C#P05784; #C#P08727; #C#P19001; #C#P35900; #C#Q14525; #C#Q14532; #C#Q15323; #C#Q497I4; #C#Q61782; #C#Q8N1A0; #C#Q92764; #C#Q99456; #C#Q9D312; #C#Q9QWL7; #C#Q9UE12; #C#REFSEQ:XP_986630	SWISS-PROT:Q04695 Tax_Id=9606 Gene_Symbol=KRT17 Keratin, type I cytoskeletal 17	462.15	9	1	9	1
#C#P00761	#C#P00761		SWISS-PROT:P00761|TRYP_PIG Trypsin - Sus scrofa (Pig).	609.06	6	6	7	7
#C#P60712	#C#P60712	AT2G37620.1; AT2G37620.2; AT2G42170.1; AT3G12110.1; AT3G46520.1; AT3G53750.1; AT5G09810.1; AT5G59370.1; AT5G59370.2	SWISS-PROT:P60712 (Bos taurus) Actin, cytoplasmic 1	321.63	5	5	6	6
#C#P02768-1	#C#P02768-1		SWISS-PROT:P02768-1 Tax_Id=9606 Gene_Symbol=ALB Isoform 1 of Serum albumin precursor	231.81	4	1	4	1
#C#Q86YZ3	#C#Q86YZ3		SWISS-PROT:Q86YZ3 Tax_Id=9606 Gene_Symbol=HRNR Hornerin	129.61	2	2	2	2
#C#sp|Q9HWK6|LYSC_PSEAE	#C#sp|Q9HWK6|LYSC_PSEAE		Lysyl endopeptidase OS=Pseudomonas aeruginosa (strain ATCC 15692 / PAO1 / 1C / PRS 101 / LMG 12228) GN=prpL PE=1 SV=1	110.31	2	2	2	2
#C#P01966	#C#P01966		SWISS-PROT:P01966 (Bos taurus) Hemoglobin subunit alpha	94.3	2	2	2	2
#C#Q7RTT2	#C#Q7RTT2; #C#Q8N1N4-2		TREMBL:Q7RTT2 Tax_Id=9606 Gene_Symbol=KRT78 Keratin-78	55.12	1	1	1	1
#C#P07477	#C#P07477		SWISS-PROT:P07477 Tax_Id=9606 Gene_Symbol=PRSS1 Trypsin-1 precursor	54.91	1	1	1	1
#C#P62894	#C#P62894		SWISS-PROT:P62894 Cytochrome c - Bos taurus (Bovine).	53.17	1	1	1	1
#C#Q0VBK2	#C#Q0VBK2; #C#Q6KB66-1		TREMBL:Q0VBK2;Q8C1M7 Tax_Id=10090 Gene_Symbol=Krt80 Keratin 80	37.84	1	1	1	1
